# Supplementary material for: A kinetic study for the estimation of riboflavin sensitized photooxidation of pyridoxine HCl using green UV-visible spectrometric and HPLC methods
Source: Royal Society of Chemistry journal article supplement (doi:10.1039/d4ra05836d), 2024-01-01
Supplement: d4ra05836d1.pdf [file d4ra05836d1.pdf]

## SUPPLEMENTARY DATA

*Anwar Z et al.*

### Research Article

#### **A Kinetic Study for the Estimation of Riboflavin (Vitamin B<sub>2</sub>) Sensitized Photooxidation of Pyridoxine HCl (Vitamin B<sub>6</sub>) by a Green UV-Visible Spectroscopic and High-Performance Liquid Chromatography (HPLC) Methods**

Zubair Anwar<sup>1</sup>, Aisha Noreen<sup>1</sup>, Muneeba Usmani<sup>2</sup>, Zuneera Akram<sup>3</sup>, Muhammad Ahsan Ejaz<sup>1</sup>,  
Muhammad Ali Sheraz<sup>2</sup>, Sofia Ahmed<sup>2</sup>, Saima Zahid<sup>1</sup>, Saba Sabir<sup>1</sup>, Syed Ghulam Musharraf<sup>4</sup>

<sup>1</sup>Department of Pharmaceutical Chemistry, Baqai Institute of Pharmaceutical Sciences, Baqai Medical University, Gadap Road, Super Highway, Karachi-75340, Pakistan

<sup>2</sup>Department of Pharmaceutics, Baqai Institute of Pharmaceutical Sciences, Baqai Medical University, Gadap Road, Super Highway, Karachi-75340, Pakistan

<sup>3</sup> Department of Pharmacology, Baqai Institute of Pharmaceutical Sciences, Baqai Medical University, Gadap Road, Super Highway, Karachi-75340, Pakistan

<sup>4</sup>Third World Centre for Science and Technology, H.E.J. Research Institute of Chemistry, University of Karachi, Karachi-75270, Pakistan

\*Corresponding Author Email: [zubair\\_ana@hotmail.com](mailto:zubair_ana@hotmail.com)/[zubair\\_ana@baqai.edu.pk](mailto:zubair_ana@baqai.edu.pk)

## 1. Assay Method Validation

### 1.1 System suitability

It was performed by the injection of six replicates of the standard solutions of PD ( $1.00 \times 10^{-4}$  M), and RF ( $0.50 \times 10^{-4}$  M) before analysis of the samples to determine the retention time ( $t_R$ ) theoretical plates (N) and tailing factor (T).

### 1.2 Linearity and Range

The linearity of the developed spectrometric and HPLC assay methods for analyzing RF, and PD were carried out in the concentration range of 0.1-1.0 and  $0.05-0.5 \times 10^{-4}$  M, respectively. The calibration curve was prepared by plotting the absorbance and peak area (A.U.) versus respective concentrations of AH<sub>2</sub> and RF. The statistical calculation was carried out for the results obtained to estimate the correlation coefficient, slope, intercept, standard deviation of intercept, and standard error of slope and intercept. The range selection was optimized from the results obtained from the linearity.

### 1.3 Accuracy

Three different concentrations of RF ( $0.1, 0.2, 0.3 \times 10^{-4}$  M) and PD ( $0.2, 0.4, 0.6 \times 10^{-4}$  M) were selected from the results obtained from the linearity and range studies. Each measurement was carried out in triplicate, and the percentage recoveries were calculated using the following equation.

$$\text{Percent recovery (\%)} = \frac{\text{Amount Added}}{\text{Amount Found}} \times 100 \quad (1.0)$$

where,

$$\text{Amount Found} = \frac{\text{Mean of 3 determinations} - \text{Intercept}}{\text{Slope}} \quad (2.0)$$

The relative accuracy error (%) was also calculated using:

$$\text{Relative accuracy error (\%)} = \frac{\text{Recovery (\%)} - \text{Mean recovery (\%)}}{\text{Mean recovery (\%)}} \times 100 \quad (3.0)$$

#### 1.4 Precision

The precision (repeatability and intermediate) of the developed method was estimated by preparing the six individual concentrations of RF ( $0.50 \times 10^{-4}$  M) and PD ( $0.50 \times 10^{-4}$  M) were subjected to spectrometric and HPLC analysis. The relative standard deviation (%) was calculated to determine the precision by the following formula.

$$\text{RSD (\%)} = \frac{\text{SD}}{\text{Mean}} \times 100 \quad (4.0)$$

#### 1.5 Sensitivity

The sensitivity of the proposed methods is the minimum quantity of analyte to be detected (LOD) and quantified (LOQ). Linearity data is used to calculate the sensitivity of the proposed methods by following the formula.

$$\text{LOD} = 3.3 \times \frac{\sigma}{S} \quad (5.0)$$

$$\text{LOD} = 10 \times \frac{\sigma}{S} \quad (6.0)$$

where,  $\sigma$  is the standard deviation of the y-intercept and S is the slope of the calibration curve.

## **1.6 Robustness**

Deliberate changes were made in the condition of the proposed methods to determine the robustness. These changes include changes in pH ( $\pm 0.1$  units), detection wavelength ( $\pm 2$  nm), buffer concentration ( $\pm 0.001$ M), and flow rate ( $\pm 0.1$  ml/min).

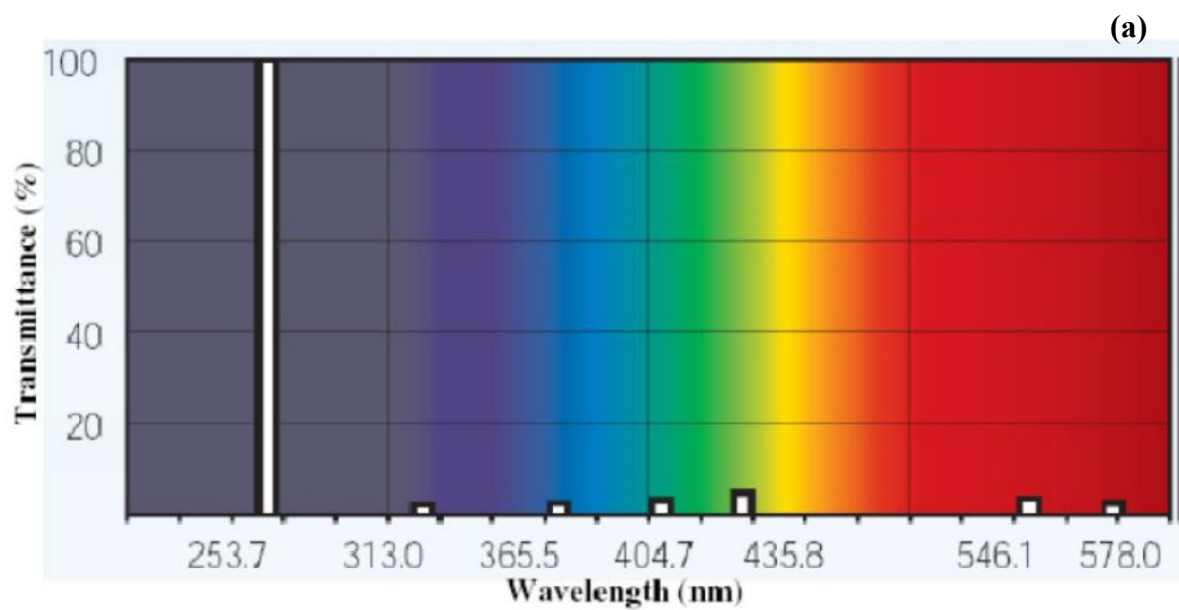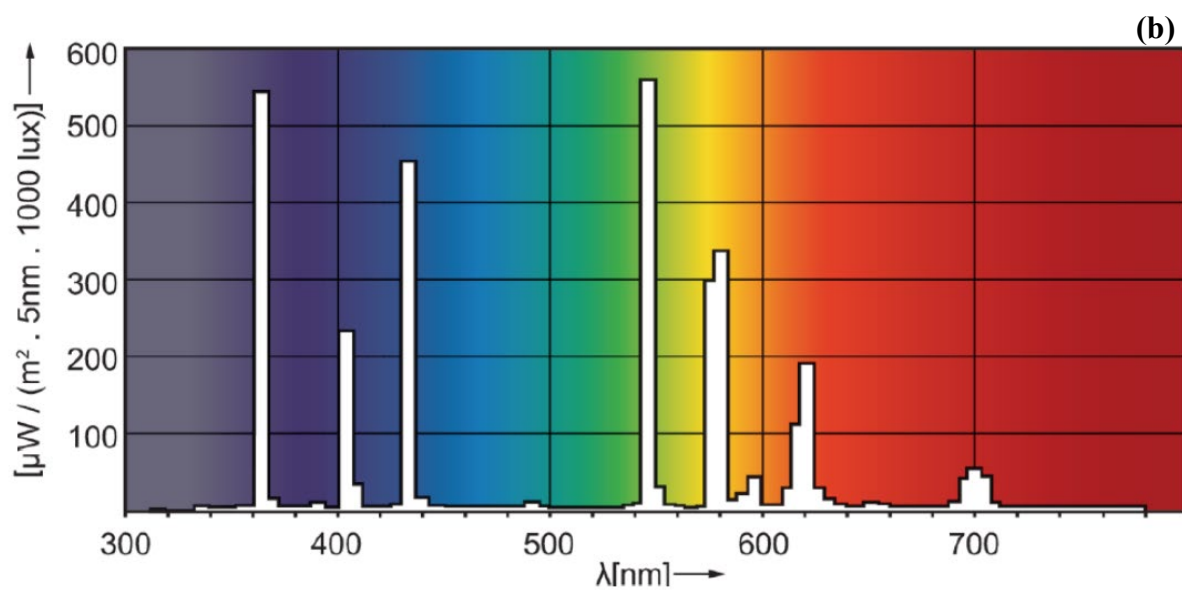

Fig. S1. Spectral emission of UV (a) and visible lamps (b)

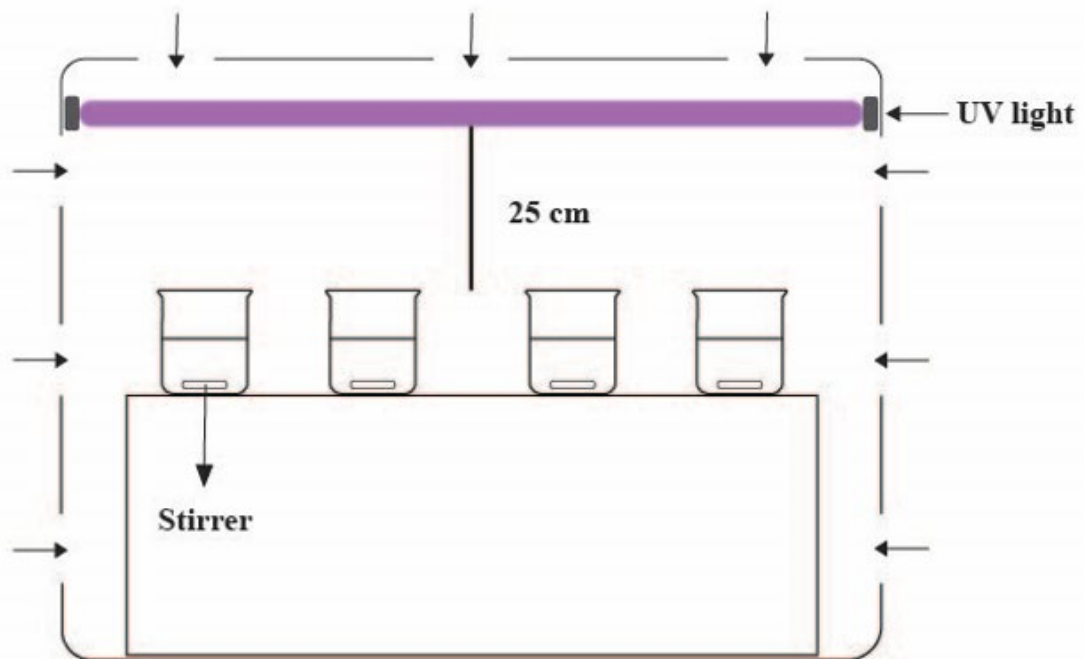

**Fig. S2.** Irradiation set up for the photolysis of PD in UV irradiation chamber.

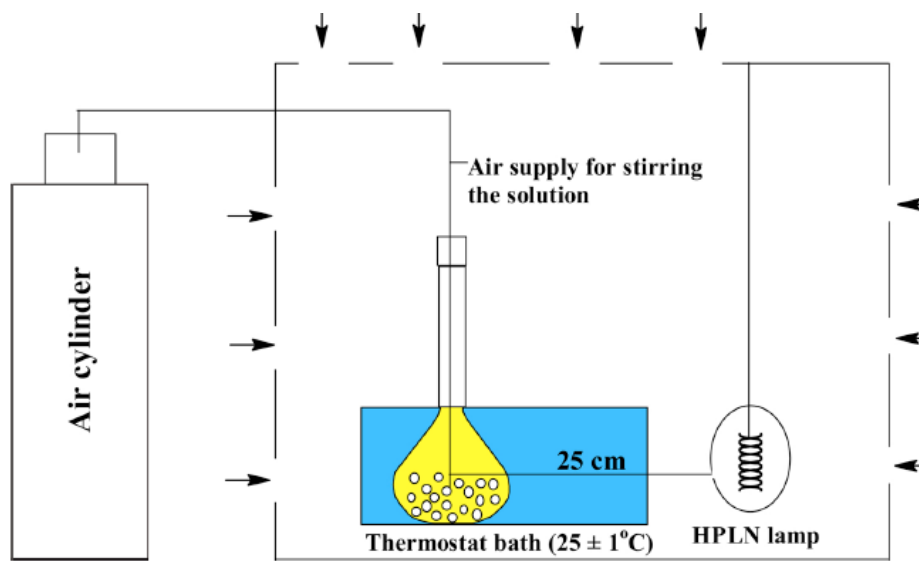

**Fig. S3.** Irradiation setup for the photolysis of PD in the visible irradiation chamber.

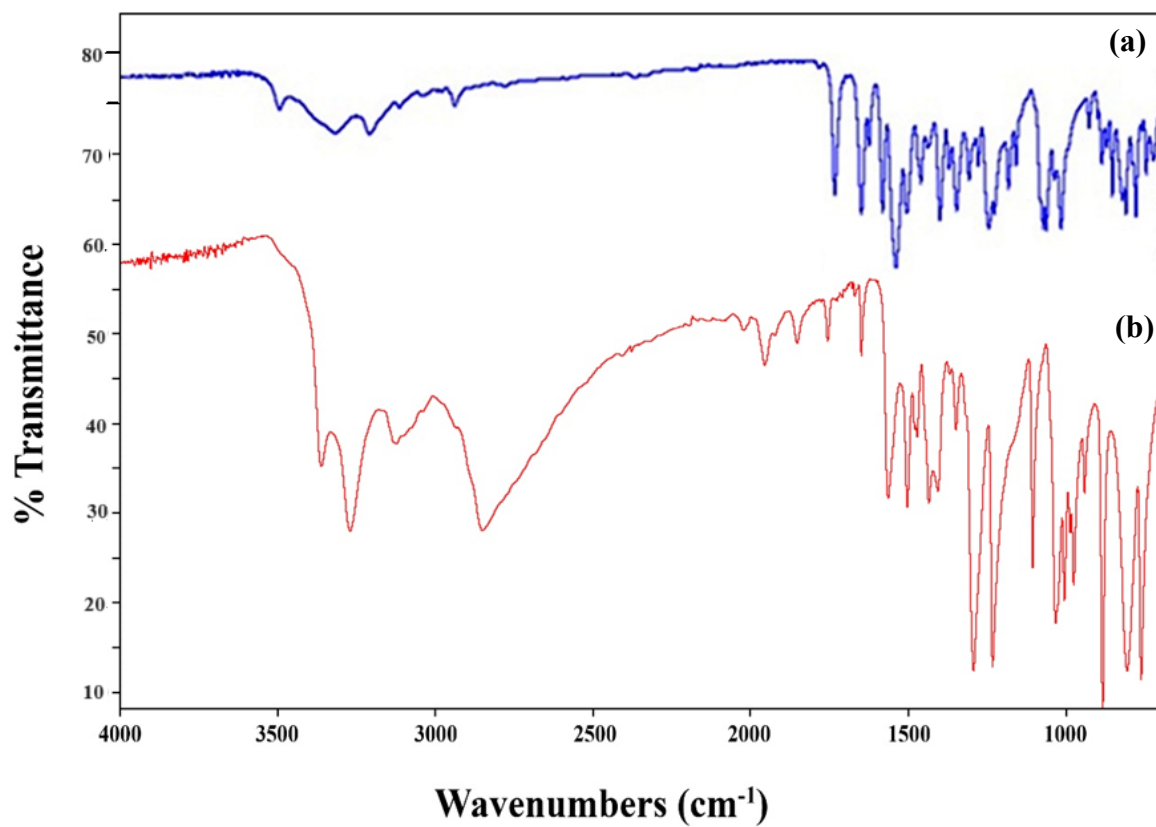

**Fig. S4.** FTIR spectra of RF (a) and PD (b).



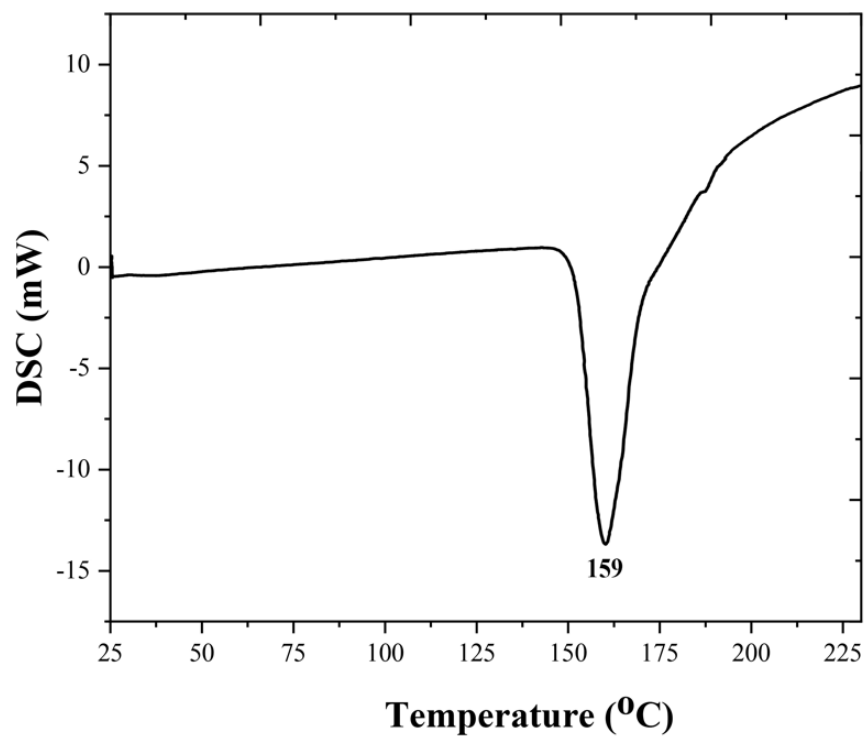

**Fig. S5.** DSC thermogram of PD.

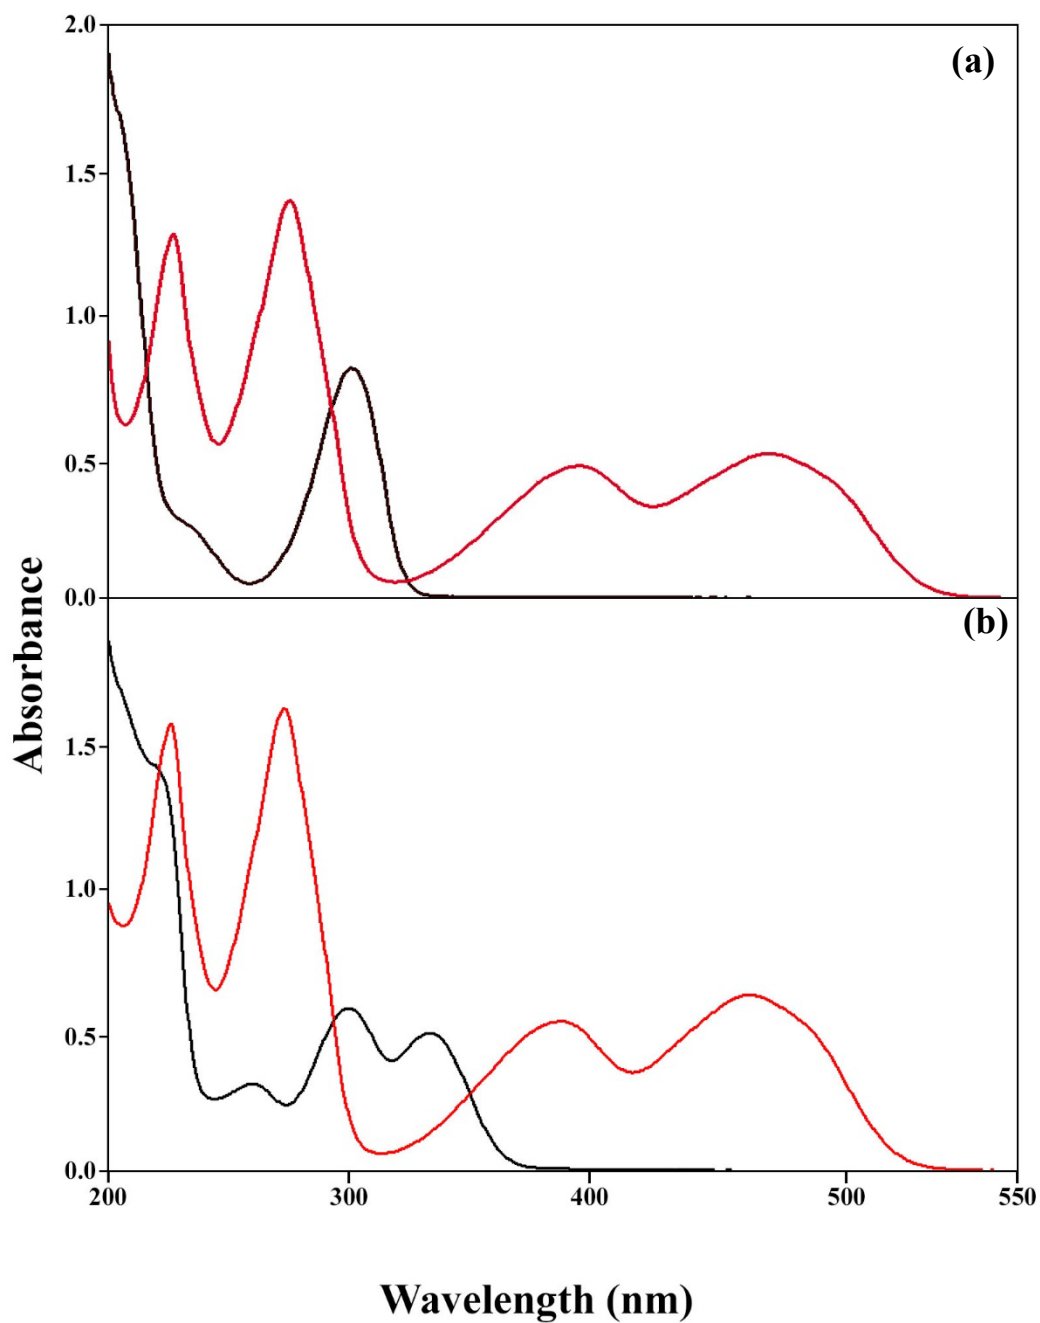

**Fig. S6a.** Absorption spectra of PD ( $1.00 \times 10^{-4}$  M, black line) and RF ( $0.50 \times 10^{-4}$  M, red line) in aqueous solution at pH 2.0 (a), and 4.5 (b).

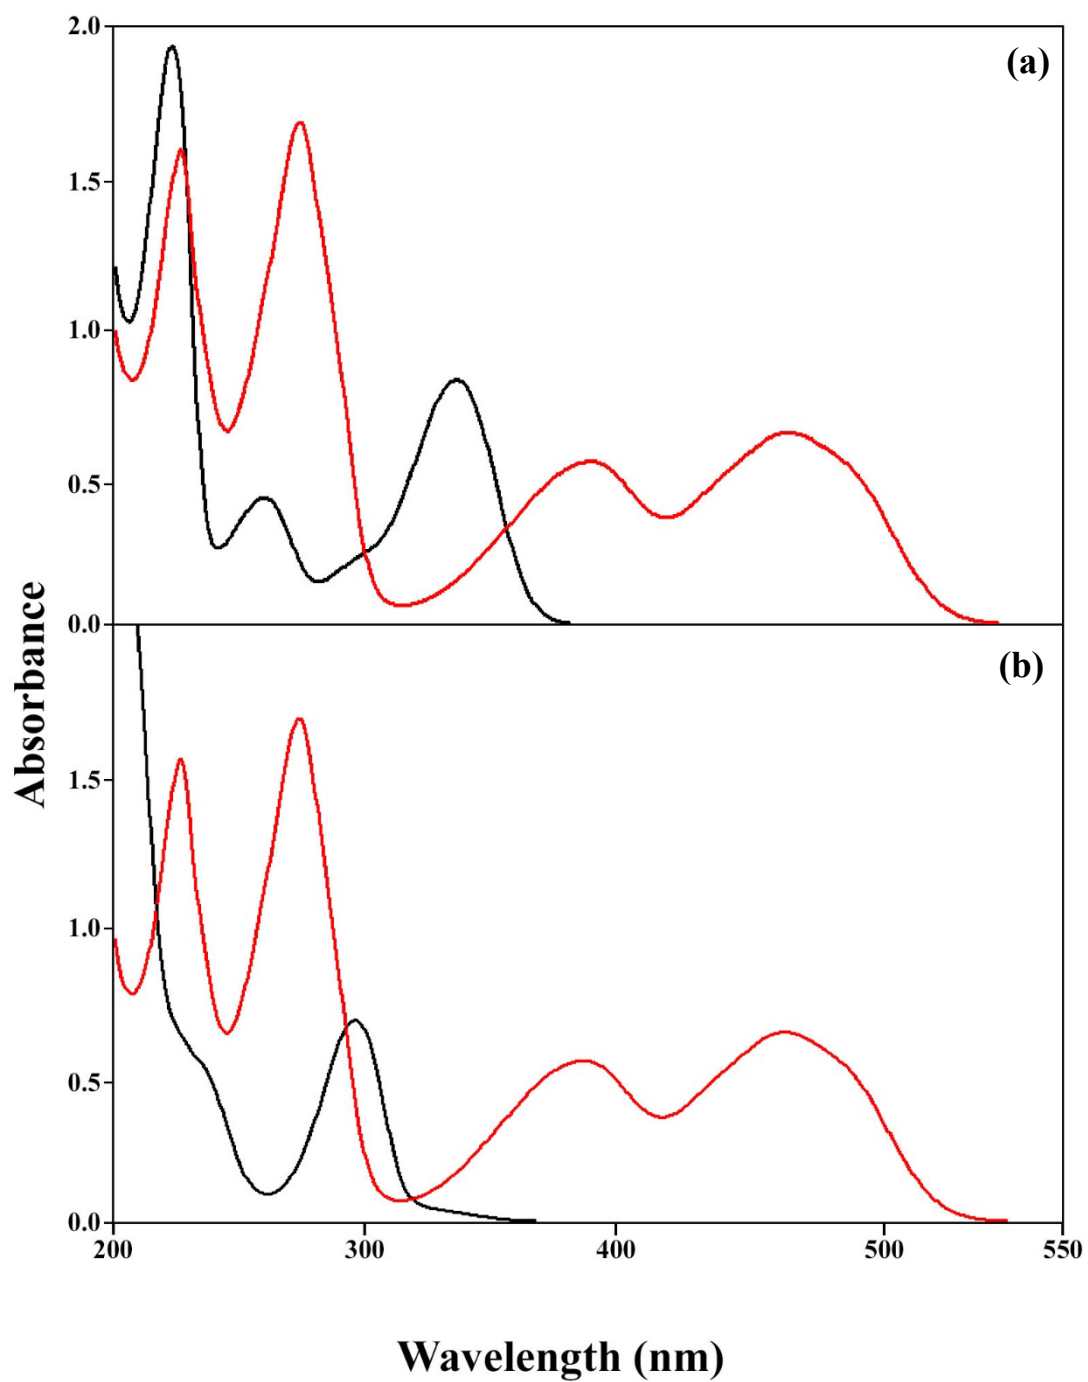

**Fig. S6b.** Absorption spectra of PD ( $1.00 \times 10^{-4}$  M, black line) and RF ( $0.50 \times 10^{-4}$  M, red line) in aqueous solution at pH 7.0 (a) and 9.0 (b).

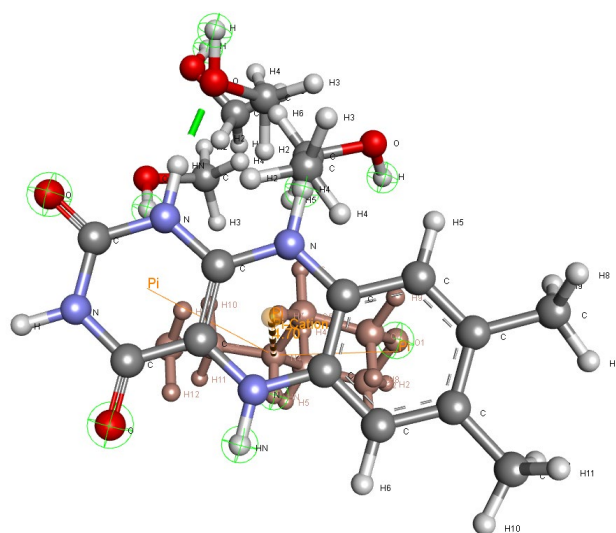

(a)

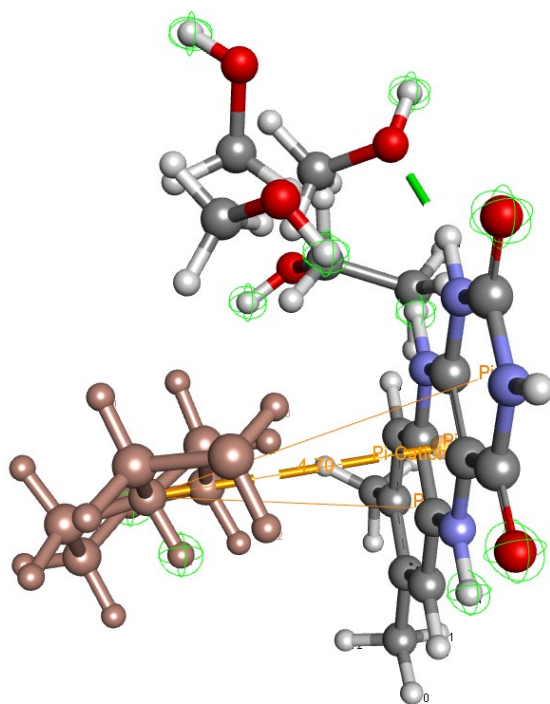

(b)

**Fig. S7.** Molecular docking studies of RF (grey structure) and PD (brown structure) indicating the molecular interaction between them

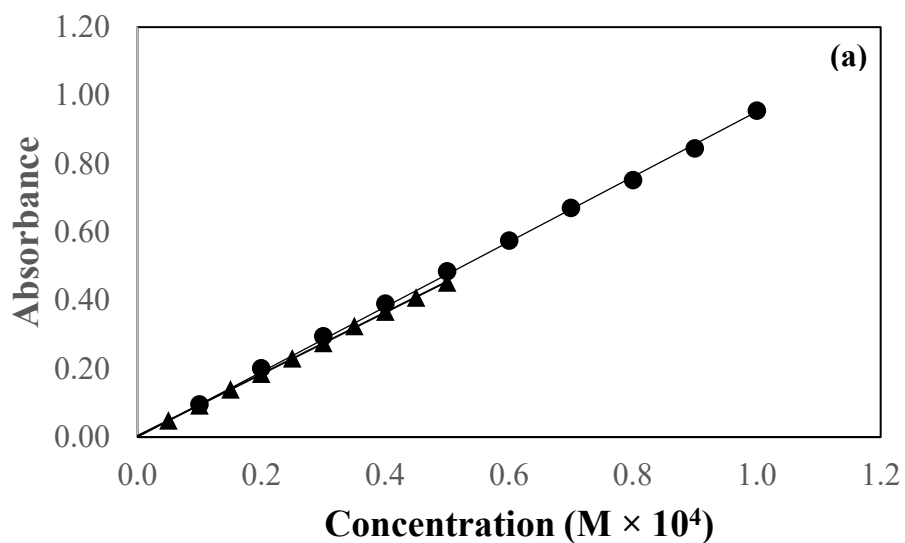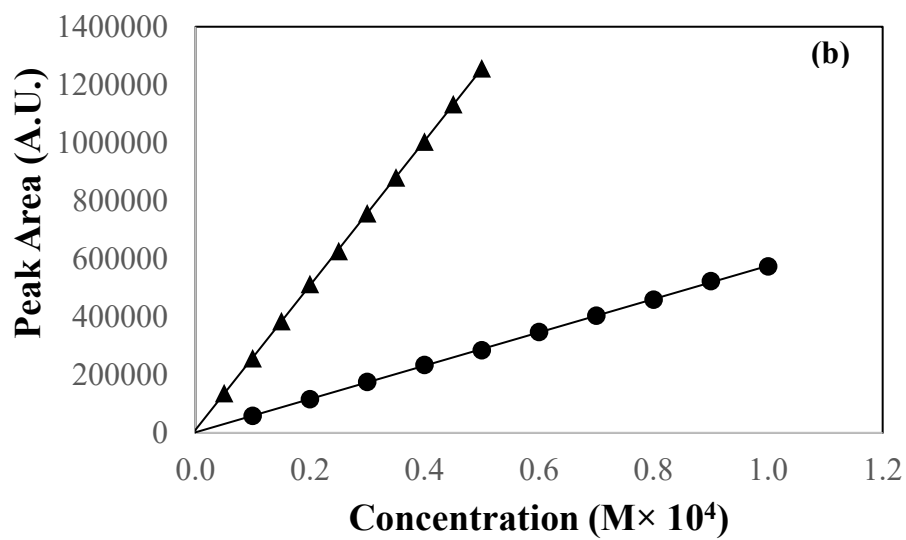

**Fig. S8.** Calibration curve of PD (●) ( $0.10-1.00 \times 10^{-4}$  M) and RF (▲) ( $0.05-0.50 \times 10^{-4}$  M) using the proposed two-component spectrometric (a) and HPLC (b) method.

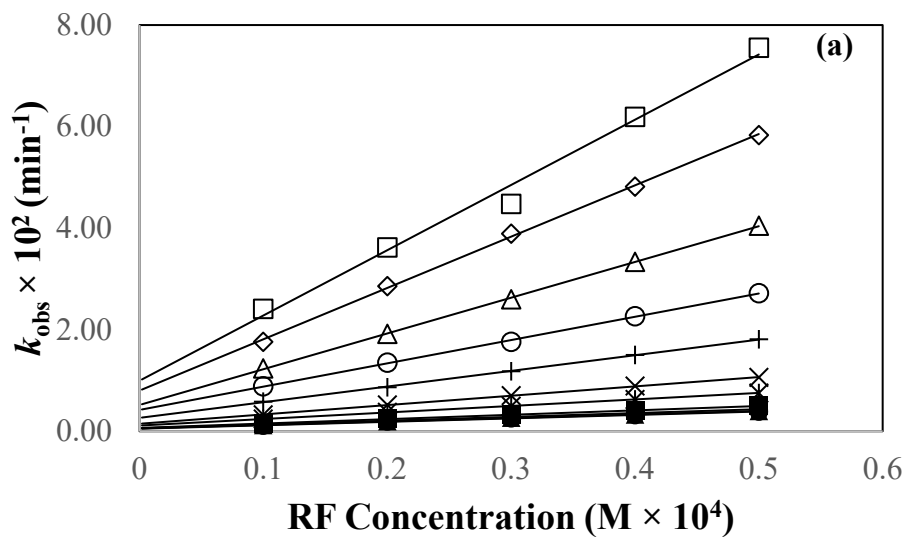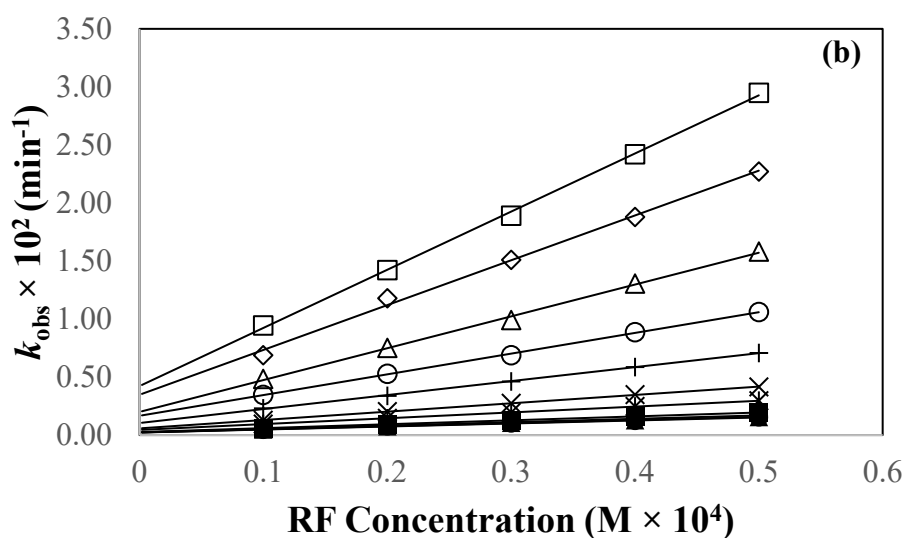

**Fig. S9.** Second-order plots for the photolysis of PD ( $1.00 \times 10^{-4}$  M) in the presence of RF ( $0.1$ - $0.50 \times 10^{-4}$  M) in aerobic condition using visible (a) and UV (b) irradiation sources at different pH values: 2.0 ( $\bullet$ ), 3.0 ( $\blacktriangle$ ), 4.0 ( $\blacklozenge$ ), 5.0 ( $\blacksquare$ ), 6.0 ( $*$ ), 7.0 ( $\times$ ), 8.0 ( $+$ ), 9.0 ( $\circ$ ), 10.0 ( $\Delta$ ), 11.0 ( $\diamond$ ), 12.0 ( $\square$ ).

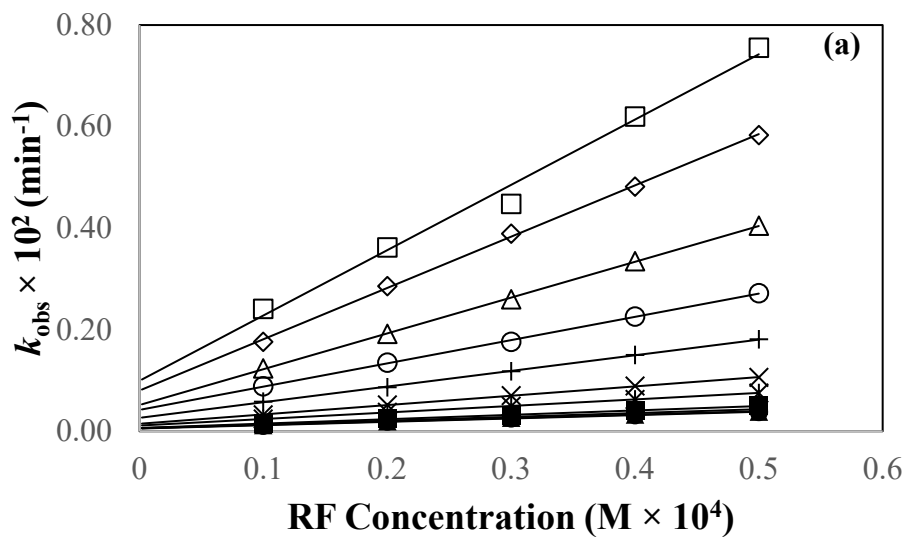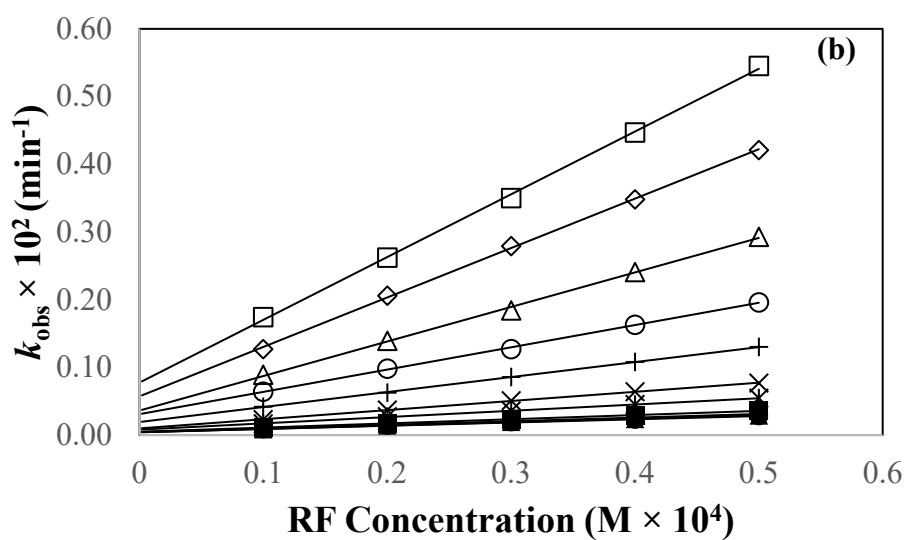

**Fig. S10.** Second-order plots for the photolysis of PD ( $1.00 \times 10^{-4}$  M) in the presence of RF ( $0.1$ - $0.50 \times 10^{-4}$  M) in anaerobic condition using visible (a) and UV (b) irradiation sources at different pH values: 2.0 ( $\bullet$ ), 3.0 ( $\blacktriangle$ ), 4.0 ( $\blacklozenge$ ), 5.0 ( $\blacksquare$ ), 6.0 ( $*$ ), 7.0 ( $\times$ ), 8.0 ( $+$ ), 9.0 ( $\circ$ ), 10.0 ( $\Delta$ ), 11.0 ( $\diamond$ ), 12.0 ( $\square$ ).

**Table S1.** Accuracy of the proposed spectrometric method for the determination of PD and RF

| PD                                 |                                       |                 |                                      |                                   | RF                                    |                                       |                 |                                      |                                   |
|------------------------------------|---------------------------------------|-----------------|--------------------------------------|-----------------------------------|---------------------------------------|---------------------------------------|-----------------|--------------------------------------|-----------------------------------|
| Added Conc<br>(M×10 <sup>4</sup> ) | Found<br>Conc<br>(M×10 <sup>4</sup> ) | Recovery<br>(%) | Mean<br>Recovery<br>(%)±SD<br>(%RSD) | Relative<br>Accuracy<br>Error (%) | Added<br>Conc<br>(M×10 <sup>4</sup> ) | Found<br>Conc<br>(M×10 <sup>4</sup> ) | Recovery<br>(%) | Mean<br>Recovery<br>(%)±SD<br>(%RSD) | Relative<br>Accuracy<br>Error (%) |
| 0.200                              | 0.200                                 | 100.0           | 100.5±0.50<br>(0.49)                 | -0.498                            | 0.100                                 | 0.099                                 | 99.0            | 99.7±0.57<br>(0.57)                  | -0.669                            |
|                                    | 0.201                                 | 100.5           |                                      | 0.000                             |                                       | 0.100                                 | 100.0           |                                      | 0.334                             |
|                                    | 0.202                                 | 101.0           |                                      | 0.498                             |                                       | 0.100                                 | 100.0           |                                      | 0.334                             |
| 0.400                              | 0.401                                 | 100.3           | 100.7±0.38<br>(0.37)                 | -0.414                            | 0.200                                 | 0.200                                 | 100.0           | 100.0±0.50<br>(0.50)                 | 0.000                             |
|                                    | 0.403                                 | 100.8           |                                      | 0.083                             |                                       | 0.199                                 | 99.5            |                                      | -0.500                            |
|                                    | 0.404                                 | 101.0           |                                      | 0.331                             |                                       | 0.201                                 | 100.5           |                                      | 0.500                             |
| 0.600                              | 0.601                                 | 100.2           | 100.3±0.19<br>(0.19)                 | -0.111                            | 0.300                                 | 0.301                                 | 100.3           | 100.2±0.51<br>(0.51)                 | 0.111                             |
|                                    | 0.603                                 | 100.5           |                                      | 0.222                             |                                       | 0.299                                 | 99.70           |                                      | -0.554                            |
|                                    | 0.601                                 | 100.2           |                                      | -0.111                            |                                       | 0.302                                 | 100.7           |                                      | 0.443                             |



**Table S2.** Precision of the developed spectrometric method for the determination of PD and RF

| PD                               |                                 |              |                             |                             | RF                              |                                 |              |                             |                             |
|----------------------------------|---------------------------------|--------------|-----------------------------|-----------------------------|---------------------------------|---------------------------------|--------------|-----------------------------|-----------------------------|
| Added Conc (M×10 <sup>4</sup> )  | Found Conc (M×10 <sup>4</sup> ) | Recovery (%) | Mean Recovery (%)±SD (%RSD) | Relative Accuracy Error (%) | Added Conc (M×10 <sup>4</sup> ) | Found Conc (M×10 <sup>4</sup> ) | Recovery (%) | Mean Recovery (%)±SD (%RSD) | Relative Accuracy Error (%) |
| <b>Repeatability (Intra-day)</b> |                                 |              |                             |                             |                                 |                                 |              |                             |                             |
| 0.500                            | 0.501                           | 100.2        | 100.2±0.29<br>(0.29)        | 0.040                       | 0.500                           | 0.500                           | 100.0        | 100.4±0.55<br>(0.55)        | -0.359                      |
|                                  | 0.499                           | 99.8         |                             | -0.361                      |                                 | 0.499                           | 99.8         |                             | -0.558                      |
|                                  | 0.503                           | 100.6        |                             | 0.437                       |                                 | 0.501                           | 100.2        |                             | -0.159                      |
|                                  | 0.500                           | 100.0        |                             | -0.160                      |                                 | 0.503                           | 100.6        |                             | 0.239                       |
|                                  | 0.501                           | 100.2        |                             | 0.040                       |                                 | 0.506                           | 101.2        |                             | 0.837                       |
|                                  | <b>Intermediate (Inter-day)</b> |              |                             |                             |                                 |                                 |              |                             |                             |
| 0.500                            | 0.500                           | 100.0        | 100.6±0.48<br>(0.48)        | -0.557                      | 0.500                           | 0.500                           | 100.0        | 100.1±0.30<br>(0.30)        | -0.120                      |
|                                  | 0.501                           | 100.2        |                             | -0.358                      |                                 | 0.499                           | 99.8         |                             | -0.320                      |
|                                  | 0.503                           | 100.6        |                             | 0.040                       |                                 | 0.501                           | 100.2        |                             | 0.080                       |
|                                  | 0.506                           | 101.2        |                             | 0.636                       |                                 | 0.503                           | 100.6        |                             | 0.479                       |
|                                  | 0.504                           | 100.8        |                             | 0.239                       |                                 | 0.500                           | 100.0        |                             | -0.120                      |

**Table S3.** Analysis of a synthetic mixture of PD and RF using the two-component spectrometric method

| <b>PD</b>                   |                                         |                 |            | <b>RF</b>                   |                                         |                 |            |
|-----------------------------|-----------------------------------------|-----------------|------------|-----------------------------|-----------------------------------------|-----------------|------------|
| <b>Added</b>                | <b>Found</b>                            | <b>Recovery</b> | <b>RSD</b> | <b>Added</b>                | <b>Found</b>                            | <b>Recovery</b> | <b>RSD</b> |
| <b>(M × 10<sup>4</sup>)</b> | <b>(M × 10<sup>4</sup>)<sup>a</sup></b> | <b>(%)</b>      | <b>(%)</b> | <b>(M × 10<sup>4</sup>)</b> | <b>(M × 10<sup>4</sup>)<sup>a</sup></b> | <b>(%)</b>      | <b>(%)</b> |
| 0.100                       | 0.099                                   | 99.00           | 0.33       | 0.450                       | 0.452                                   | 100.4           | 0.41       |
| 0.200                       | 0.199                                   | 99.50           | 0.15       | 0.400                       | 0.406                                   | 101.5           | 0.65       |
| 0.300                       | 0.301                                   | 100.3           | 0.63       | 0.350                       | 0.353                                   | 100.8           | 0.38       |
| 0.400                       | 0.405                                   | 101.2           | 0.77       | 0.300                       | 0.304                                   | 101.3           | 0.66       |
| 0.500                       | 0.500                                   | 100.0           | 0.25       | 0.250                       | 0.252                                   | 100.8           | 0.28       |
| 0.600                       | 0.604                                   | 100.6           | 0.41       | 0.200                       | 0.201                                   | 100.5           | 0.46       |
| 0.700                       | 0.703                                   | 100.4           | 0.35       | 0.150                       | 0.152                                   | 101.3           | 0.64       |
| 0.800                       | 0.803                                   | 100.3           | 0.39       | 0.100                       | 0.101                                   | 101.0           | 0.68       |
| 0.900                       | 0.904                                   | 100.4           | 0.41       | 0.050                       | 0.049                                   | 99.80           | 0.87       |

<sup>a</sup> Values represent the mean of 5 determinations.

**Table S3.** Accuracy of the proposed HPLC method for the determination of PD and RF

| PD                              |                                 |              |                             |                             | RF                              |                                 |              |                             |                             |       |
|---------------------------------|---------------------------------|--------------|-----------------------------|-----------------------------|---------------------------------|---------------------------------|--------------|-----------------------------|-----------------------------|-------|
| Added Conc (M×10 <sup>4</sup> ) | Found Conc (M×10 <sup>4</sup> ) | Recovery (%) | Mean Recovery (%)±SD (%RSD) | Relative Accuracy Error (%) | Added Conc (M×10 <sup>4</sup> ) | Found Conc (M×10 <sup>4</sup> ) | Recovery (%) | Mean Recovery (%)±SD (%RSD) | Relative Accuracy Error (%) |       |
| 0.200                           | 0.202                           | 101.1        |                             | -0.703                      | 0.100                           | 0.098                           | 98.8         |                             | -0.065                      |       |
|                                 |                                 |              | 101.8±0.67                  |                             |                                 |                                 |              | 98.9±0.14                   |                             |       |
|                                 | 0.205                           | 102.5        | (0.66)                      | 0.611                       |                                 |                                 | 0.099        | 99.0                        | (0.14)                      | 0.164 |
|                                 | 0.204                           | 101.9        |                             | 0.092                       |                                 | 0.098                           | 98.8         |                             | -0.099                      |       |
| 0.400                           | 0.402                           | 100.5        |                             | -0.640                      | 0.200                           | 0.201                           | 100.6        |                             | -0.376                      |       |
|                                 |                                 |              | 101.1±0.56                  |                             |                                 |                                 |              | 101.0±0.35                  |                             |       |
|                                 | 0.406                           | 101.5        | (0.56)                      | 0.386                       |                                 |                                 | 0.202        | 101.0                       | (0.35)                      | 0.071 |
|                                 | 0.405                           | 101.4        |                             | 0.254                       |                                 | 0.203                           | 101.3        |                             | 0.305                       |       |
| 0.600                           | 0.603                           | 100.4        |                             | 0.106                       | 0.300                           | 0.299                           | 99.8         |                             | -0.041                      |       |
|                                 |                                 |              | 100.3±0.64                  |                             |                                 |                                 |              | 99.8±0.03                   |                             |       |
|                                 | 0.598                           | 99.6         | (0.64)                      | -0.685                      |                                 |                                 | 0.300        | 99.8                        | (0.03)                      | 0.026 |
|                                 | 0.605                           | 100.9        |                             | 0.579                       |                                 | 0.300                           | 99.8         |                             | 0.015                       |       |

**Table S4.** Precision of the developed HPLC method for the determination of PD and RF

| PD                                 |                                    |              |                                   |                                | RF                                 |                                    |              |                                   |                                |
|------------------------------------|------------------------------------|--------------|-----------------------------------|--------------------------------|------------------------------------|------------------------------------|--------------|-----------------------------------|--------------------------------|
| Added Conc<br>(M×10 <sup>4</sup> ) | Found Conc<br>(M×10 <sup>4</sup> ) | Recovery (%) | Mean Recovery<br>(%)±SD<br>(%RSD) | Relative Accuracy<br>Error (%) | Added Conc<br>(M×10 <sup>4</sup> ) | Found Conc<br>(M×10 <sup>4</sup> ) | Recovery (%) | Mean Recovery<br>(%)±SD<br>(%RSD) | Relative Accuracy<br>Error (%) |
| <b>Repeatability (Intra-day)</b>   |                                    |              |                                   |                                |                                    |                                    |              |                                   |                                |
| 0.500                              | 0.505                              | 101.0        | 100.9±0.52<br>(0.52)              | 0.062                          | 0.500                              | 0.504                              | 100.8        | 100.9±0.29<br>(0.29)              | 0.194                          |
|                                    | 0.503                              | 100.7        |                                   | -0.266                         |                                    | 0.502                              | 100.4        |                                   | -0.320                         |
|                                    | 0.505                              | 101.0        |                                   | 0.082                          |                                    | 0.502                              | 100.4        |                                   | -0.245                         |
|                                    | 0.509                              | 101.7        |                                   | 0.770                          |                                    | 0.503                              | 100.6        |                                   | -0.005                         |
|                                    | 0.501                              | 100.3        |                                   | -0.659                         |                                    | 0.505                              | 101.0        |                                   | 0.377                          |
| <b>Intermediate (Inter-day)</b>    |                                    |              |                                   |                                |                                    |                                    |              |                                   |                                |
| 0.500                              | 0.508                              | 101.7        | 101.2±0.53<br>(0.53)              | 0.475                          | 0.500                              | 0.502                              | 100.4        | 101.1±0.93<br>(0.92)              | -0.609                         |
|                                    | 0.507                              | 101.4        |                                   | 0.148                          |                                    | 0.504                              | 100.8        |                                   | -0.032                         |
|                                    | 0.509                              | 101.7        |                                   | 0.495                          |                                    | 0.507                              | 101.4        |                                   | 0.538                          |
|                                    | 0.503                              | 100.7        |                                   | -0.534                         |                                    | 0.500                              | 100.0        |                                   | -1.115                         |
|                                    | 0.503                              | 100.6        |                                   | -0.584                         |                                    | 0.509                              | 101.8        |                                   | 1.219                          |

**Table S6.** Robustness of the developed HPLC method for the determination of PD ( $1.00 \times 10^4$  M) and RF ( $0.50 \times 10^4$  M)

| Parameters                         | PD                              |                     |                             | RF                              |                     |                             |
|------------------------------------|---------------------------------|---------------------|-----------------------------|---------------------------------|---------------------|-----------------------------|
|                                    | Accuracy(%) <sup>a</sup><br>±SD | Precision<br>(%RSD) | <i>t</i> -test <sup>b</sup> | Accuracy(%) <sup>a</sup><br>±SD | Precision<br>(%RSD) | <i>t</i> -test <sup>b</sup> |
| <b>Wavelength<br/>(±2 nm)</b>      |                                 |                     |                             |                                 |                     |                             |
| 278                                | 101.4±0.44                      | 0.44                | 0.75                        | 100.2±0.61                      | 0.60                | 0.85                        |
| 282                                | 100.5±0.21                      | 0.20                | 0.81                        | 101.3±0.75                      | 0.75                | 0.63                        |
| <b>pH<br/>(±0.01 units)</b>        |                                 |                     |                             |                                 |                     |                             |
| 3.49                               | 101.4±0.38                      | 0.37                | 0.99                        | 100.2±0.41                      | 0.40                | 0.97                        |
| 3.51                               | 100.3±0.11                      | 0.11                | 0.84                        | 101.4±0.65                      | 0.65                | 1.01                        |
| <b>Flow rate<br/>(±0.2 ml/min)</b> |                                 |                     |                             |                                 |                     |                             |
| 0.8                                | 100.2±0.34                      | 0.33                | 1.05                        | 99.85±0.75                      | 0.74                | 0.82                        |
| 1.2                                | 100.4±0.11                      | 0.10                | 0.95                        | 100.3±0.81                      | 0.81                | 0.94                        |

<sup>a</sup> Accuracy is a mean recovery (%), where n = 5

<sup>b</sup> At a 95% confidence interval, the tabulated value for two-degree freedom is 2.776 and the values obtained are in the range of 0.63-1.05. Therefore, the  $t_{cal} < t_{tab}$ , and there is no difference between the applied changes and the proposed method conditions.

**Table S7.** Analysis of a synthetic mixture of PD and RF using the proposed HPLC method

| <b>PD</b>                   |                                         |                 |            | <b>RF</b>                   |                                         |                 |            |
|-----------------------------|-----------------------------------------|-----------------|------------|-----------------------------|-----------------------------------------|-----------------|------------|
| <b>Added</b>                | <b>Found</b>                            | <b>Recovery</b> | <b>RSD</b> | <b>Added</b>                | <b>Found</b>                            | <b>Recovery</b> | <b>RSD</b> |
| <b>(M × 10<sup>4</sup>)</b> | <b>(M × 10<sup>4</sup>)<sup>a</sup></b> | <b>(%)</b>      | <b>(%)</b> | <b>(M × 10<sup>4</sup>)</b> | <b>(M × 10<sup>4</sup>)<sup>a</sup></b> | <b>(%)</b>      | <b>(%)</b> |
| 0.100                       | 0.101                                   | 101.4           | 0.25       | 0.450                       | 0.448                                   | 99.51           | 0.62       |
| 0.200                       | 0.200                                   | 99.86           | 0.19       | 0.400                       | 0.402                                   | 100.6           | 0.18       |
| 0.300                       | 0.300                                   | 100.1           | 0.34       | 0.350                       | 0.349                                   | 99.61           | 0.88       |
| 0.400                       | 0.399                                   | 99.74           | 0.55       | 0.300                       | 0.302                                   | 100.7           | 0.47       |
| 0.500                       | 0.501                                   | 100.1           | 0.17       | 0.250                       | 0.252                                   | 100.8           | 0.99       |
| 0.600                       | 0.599                                   | 99.85           | 0.19       | 0.200                       | 0.201                                   | 100.5           | 0.84       |
| 0.700                       | 0.702                                   | 100.3           | 0.78       | 0.150                       | 0.150                                   | 100.2           | 0.25       |
| 0.800                       | 0.802                                   | 100.2           | 0.49       | 0.100                       | 0.100                                   | 100.1           | 0.18       |
| 0.900                       | 0.903                                   | 100.3           | 0.87       | 0.050                       | 0.051                                   | 100.1           | 0.33       |

<sup>a</sup> Values represent the mean of 5 determinations.
